# Supplementary material for: Trend analysis of precipitation and temperature in Lahaul-Spiti district, Himachal Pradesh, India
Source: Frontiers journal article supplement (doi:10.3389/fclim.2024.1348132), 2025-02-10
Supplement: Supplementary_file_1.docx [file Supplementary_file_1.docx]

**Questionnaire**

***Trend analysis of Precipitation and Temperature***

***in Lahaul- Spiti District, Himachal Pradesh, India***

Name of the Village………………………. Block …………………………..

Village Code ……………………………… Tahsil …………………………..

**General Information**

1. **Name**: .............................................
2. **Age:** a) 21-45 b) 45-65 c) 65 and above
3. **Sex:** a) Male b) Female
4. **Educational Qualification:** a) Below 10th b) 10+2

c) Graduate d) PG/Others

1. **Occupation:** a) Agriculture b) Industry c) Service Sector
2. **Total number of family members:** a) 1-2 b) 3-4 c) 5-6 d) 7-8

e) < 9 members

1. **Migration Status:**
2. **Monthly income:** a) > 5000 R b) 5001-10000 c) 10001-15000 d) < 15001 Rupees
3. **To analyse the seasonal trend of precipitation and temperature.**
   1. In which month precipitation starts?

a) September b) October c) November d) Can’t say

- 1. What is the duration of precipitation?

a) 2–3 months b) 3 – 4 months c) 4 – 5 months d) Above 6months

- 1. Is it true that snowfall has become unpredictable in valley?

a) Yes b) No c) Can’t Say

- 1. Have you observed any change in the form of precipitation?

a) Snowfall increased/decreased b) Snowfall increased/decreased c) Can’t Say

- 1. Is there any change in the total duration of snowfall in the surrounding the village?

a) Increase b) Decrease c) Constant

- 1. Do you observe variation in onset of snowfall?

a) Early starts b) Late Starts c) Early withdrawal

d) Late Withdrawal

1.8 How would you say in variation of snowfall?

a) Very Less b) Less c) Moderate d) High e) Very High

- 1. Have you observed any change in the pattern of snowfall in last two-three decades?

a) Shorter b) Longer c) Constant d) Can’t say

- 1. Do you notice change in the tendency of snowfall?

a) Heavy snowfall b) Moderate snowfall c) Light snowfall

i) Longer i) Longer i) Longer

ii) Shorter ii) Shorter ii) Shorter

- 1. What is the intensity of changing pattern of snowfall?

a) High b) Moderate c) Low

d) Can’t say

- 1. Have you observed a seasonal shift in the timing of snowfall?

a) Yes b) No c) Can’t Say

- 1. Have you observed any change in the temperature of local environment?

a) Increased/decreased b) Decreased c) Can’t Say

- 1. Do you think that rise in temperature increased the frequency of rainfall?

a) Yes b) No c) Can’t Say

**2. To assess the seasonal variability in snow cover area.**

2.1 Snow cover area is found maximum in which month?

a) December b) January c) February d) Can’t say

2.2 Snow cover area is found minimum in which month?

a) December b) January c) February d) Can’t say

2.3 Do you observe the change in snow cover area?

a) Increase b) Decrease c) Constant d) Can’t say

2.4 What are the major causes of changing in snow cover area in the past two-three decades?

a) Change in temperature/increase in temperature b) Decrease in snowfall c) Shorter duration of snowfall d) Shift in vegetation zone e) More intense human activities

2.5 What are the impacts of change in snow cover in day to day activity of the local people?

a) Change in dressing pattern b) Change in food habits c) Change in cropping pattern and live stock herding d) Any other

2.6 Do you observe any change in the availability of snow around your village?

a) Available for long time b) Available for short time c) As usual

2.7 In the case snow available for short duration then what are the major causes behind that?

a) Snow melt very rapidly b) Reduction in snow fall c) Increase air temperature

2.8 Dou you notice change in the intensity of melting snow?

a) Yes b) No c) Can’t say

2.9 If there is change in intensity of melting snow then what is the intensity?

a) Very high b) High c) Low

d) Very low

- 1. Are you aware about climate change and its impact on snow cover area?

a) Yes b) No c) Can’t Say

**3**. **Implications of snow cover variations on socio-economic conditions of mountain dwellers.**

3.1 Have you noticed any change in land use / land cover in the last two-three decades?

a) Yes b) No c) Can’t Say

3.2 Which area has mostly changed?

a) Vegetation Cover b) Agricultural land c) Snow Cover

d) Water body e) any other

3.3 Have you observed any change in water body?

a) Increase b) Decrease c) Constant d) Can’t Say

3.4 Distance of water body from your village or household?

a) Less than 1 km. b) 2 to 4 km. c) More than 4 km.

3.5 Have you noticed any change in water availability around your village?

a) Available for short period b)Available for Long period c) Constant

d) Can’t say

3.6 Do you observe seasonal variation in the availability of water in local streams?

a) Water availability in summer b) Water availability in winter c) Water available in autumn

i) Increase i) Increase i) Increase

ii) Decrease ii) Decrease ii) Decrease

iii) Constant iii) Constant iii) Constant

3.7 Role and importance of vegetation cover to you?

a) Fuel wood b) Food fodder c) Grazing c) Herbs/medicine

3.8 Do you observe any change in agricultural land / cultivated land?

a) Increase b) Decrease c) Constant c) Can’t Say

3.9 What do you think what kinds of changes taking place over the period of last two decades?

a) Agricultural land b) Fallow land c) Waste land

i) Increase i) Increase i) Increase

ii) Decrease ii) Decrease ii) Decrease

iii) Constant iii) Constant iii) Constant

3.10 Have you noticed variation in cropping pattern in the last two decades?

a) Yes b) No c) Can’t Say

3.11 Do you observe any change in the overall snow cover?

a) Decrease b) Increase c) Constant

d) Can’t say

3.12 Have you observed change in snowfall pattern affect the volume of water in river?

a) During heavy snow fall b) During light snow fall c) Can’t Say

i) Increase i) Increase

ii) Decrease ii) Decrease
